# Supplementary material
Source: bioRxiv or medRxiv preprint supplement (https://medrxiv.org/highwire/filestream/85071/field_highwire_adjunct_files/0/2020.06.08.20125245-1.pdf)
Supplement: Supplementary file [file 2020.06.08.20125245-1.pdf]

## Effects of Tocilizumab on Mortality in Hospitalized Patients with COVID-19: A Multicenter Cohort Study

### Supplementary Material

**Table S1. Baseline characteristics of population excluded because of missing information**

|                                                | Control group (n = 739) |                 | Tocilizumab (n = 79) |                    | p     |
|------------------------------------------------|-------------------------|-----------------|----------------------|--------------------|-------|
| <b>Age, median (IQR)</b>                       | n=739                   | 69 (54 – 81)    | n=79                 | 67 (58 – 75)       | 0.312 |
| <b>Gender, n (%)</b>                           |                         |                 |                      |                    |       |
| Male                                           | n=407                   | 407 (55)        | n=55                 | 55 (70)            | 0.013 |
| Female                                         | n=332                   | 332 (45)        | n=24                 | 24 (30)            |       |
| <b>Past medical history, n (%)</b>             |                         |                 |                      |                    |       |
| Hypertension                                   | n=739                   | 133 (18)        | n=79                 | 20 (25)            | 0.120 |
| Diabetes                                       | n=739                   | 199 (27)        | n=79                 | 25 (32)            | 0.391 |
| Congestive heart failure                       | n=739                   | 31 (4)          | n=79                 | 4 (5)              | 0.727 |
| Coronary artery disease                        | n=739                   | 50 (7)          | n=79                 | 6 (8)              | 0.794 |
| Chronic kidney disease                         | n=739                   | 31 (4)          | n=79                 | 1 (1)              | 0.202 |
| Lung disease                                   | n=739                   | 55 (7)          | n=79                 | 3 (4)              | 0.225 |
| <b>Vital signs at admission</b>                |                         |                 |                      |                    |       |
| Heart rate (bpm), median (IQR)                 | n=683                   | 80 (71 – 90)    | n=68                 | 82 (72 – 93)       | 0.563 |
| Systolic blood pressure (mmHg), median (IQR)   | n=506                   | 126 (112 – 140) | n=45                 | 120 (110 – 133)    | 0.049 |
| Temperature (°C), median (IQR)                 | n=715                   | 36.4 (36 – 37)  | n=71                 | 36.6 (36.1 – 37.1) | 0.099 |
| Peripheral oxygen saturation (%), median (IQR) | n=378                   | 95 (93 – 97)    | n=14                 | 93 (85 – 95)       | 0.002 |
| Needing supplemental oxygen                    | n=734                   | 190 (26)        | n=79                 | 18 (23)            | 0.548 |

| <b>Baseline laboratory</b>                         |       |                    |      |                     |        |
|----------------------------------------------------|-------|--------------------|------|---------------------|--------|
| Absolute lymphocyte count (cells/uL), median (IQR) | n=582 | 110 (790 - 1560)   | n=71 | 890 (700 - 1250)    | 0.003  |
| Absolute neutrophil count (cells/uL), median (IQR) | n=582 | 4550 (3060 - 6800) | n=71 | 6210 (3720 - 10360) | <0.001 |
| LDH (U/L), median (IQR)                            | n=524 | 482 (388 - 630)    | n=69 | 628 (489 - 942)     | <0.001 |
| ALT (U/L), median (IQR)                            | n=500 | 24 (16 - 39)       | n=71 | 30 (20 - 41)        | 0.037  |
| Urea (mg/dL), median (IQR)                         | n=519 | 35 (27 - 51)       | n=68 | 38 (25 - 50)        | 0.522  |
| C-reactive protein (mg/L), median (IQR)            | n=551 | 54 (18-114)        | n=71 | 120 (40-208)        | <0.001 |
| D-dimer (ng/mL), median (IQR)                      | n=385 | 636 (370 - 1519)   | n=67 | 784 (525 - 1754)    | 0.038  |
| Interleukin 6 (pg/mL), median (IQR)                | n=6   | 41 (18 - 193)      | n=10 | 34 (14 - 820)       | 0.983  |
| <b>Outcome</b>                                     |       |                    |      |                     |        |
| Non-ICU length of stay (days), median (IQR)        | n=739 | 7 (4 - 9)          | n=79 | 14 (10 - 19)        | <0.001 |
| ICU admission, n (%)                               | n=739 | 38 (5)             | n=79 | 28 (35)             | <0.001 |
| ICU length of stay (days), median (IQR)            | n=38  | 2 (1 - 3)          | n=28 | 6 (2 - 11)          | 0.006  |
| Mortality, n (%)                                   | n=739 | 123 (17)           | n=79 | 28 (35)             | <0.001 |
| ICU or mortality, n (%)                            | n=739 | 123 (17)           | n=79 | 30 (38)             | <0.001 |

Abbreviations: ALT, alanine aminotransferase; ICU, intensive care unit; IQR, interquartile range; LDH, lactate dehydrogenase.

**Table S2. Adjusted hazard ratios for tocilizumab use in marginal structural models.**

|                                            | C-reactive protein >150 mg/dL |      |            |       |                  |            |       | C-reactive protein ≤ 150 mg/dL |      |            |       |                  |            |       |
|--------------------------------------------|-------------------------------|------|------------|-------|------------------|------------|-------|--------------------------------|------|------------|-------|------------------|------------|-------|
|                                            | Mortality                     |      |            |       | ICU or mortality |            |       | Mortality                      |      |            |       | ICU or mortality |            |       |
|                                            | No.                           | aHR  | 95% CI     | p     | aHR              | 95% CI     | p     | No.                            | aHR  | 95% CI     | p     | aHR              | 95% CI     | p     |
| <b>All</b>                                 | 286                           | 0.34 | 0.16, 0.72 | 0.005 | 0.39             | 0.19, 0.80 | 0.011 | 943                            | 1.21 | 0.65, 2.23 | 0.552 | 1.41             | 0.77, 2.58 | 0.264 |
| <b>Lymphocyte count &lt; 1000 cells/uL</b> | 187                           | 0.24 | 0.10, 0.57 | 0.001 | 0.24             | 0.10, 0.57 | 0.001 | 397                            | 1.20 | 0.61, 2.37 | 0.591 | 1.37             | 0.69, 2.71 | 0.361 |
| <b>D-dimer &gt; 1000 ng/mL</b>             | 147                           | 0.23 | 0.09, 0.61 | 0.003 | 0.23             | 0.09, 0.61 | 0.003 | 282                            | 1.29 | 0.55, 3.03 | 0.555 | 1.35             | 0.58, 3.13 | 0.489 |
| <b>Receiving corticosteroids</b>           | 176                           | 0.39 | 0.17, 0.90 | 0.028 | 0.44             | 0.20, 0.98 | 0.046 | 406                            | 0.86 | 0.44, 1.65 | 0.645 | 1.00             | 0.43, 1.88 | 0.995 |
| <b>Receiving hydroxychloroquine</b>        | 270                           | 0.32 | 0.13, 0.79 | 0.015 | 0.38             | 0.16, 0.91 | 0.030 | 864                            | 1.35 | 0.69, 2.63 | 0.373 | 1.59             | 0.83, 3.05 | 0.163 |
| <b>Receiving azithromycin</b>              | 212                           | 0.39 | 0.12, 1.22 | 0.105 | 0.44             | 0.16, 1.20 | 0.108 | 600                            | 1.07 | 0.42, 2.70 | 0.894 | 1.31             | 0.54, 3.17 | 0.550 |
| <b>Receiving lopinavir/ritonavir</b>       | 199                           | 0.26 | 0.77, 0.88 | 0.030 | 0.34             | 0.11, 1.13 | 0.079 | 554                            | 1.40 | 0.56, 3.54 | 0.472 | 1.75             | 0.72, 4.27 | 0.219 |

Table shows adjusted hazard ratios for tocilizumab versus non-tocilizumab (reference category).

Models adjusted for sex, age, comorbidities (hypertension, diabetes, ischemic heart disease, chronic kidney disease, congestive heart failure, lung disease), need for oxygen therapy at baseline, oxygen blood saturation and time-varying parameters of severity (blood pressure, heart rate, total lymphocyte and neutrophil count, LDH, ALT, urea, D-dimer, and C reactive protein).

Abbreviations: aHR, adjusted hazard ratio; ALT, alanine aminotransferase, CI, confidence interval; LDH, lactate dehydrogenase; No, number of individuals.
